# Supplementary material for: Research and Performance Evaluation on Selective Absorption of H2S from Gas Mixtures by Using Secondary Alkanolamines
Source: MDPI journal article supplement (doi:10.3390/pr10091795), 2022-09-06

---

*Article*

# Research and Performance Evaluation on Selective Absorption of H<sub>2</sub>S from Gas Mixtures by Using Secondary Alkanolamines

Jingwen Xue <sup>1,2</sup>, Chaoyue Yang <sup>1,2</sup>, Jingqiang Fu <sup>2,3</sup>, Jinlong He <sup>1,2</sup> and Jinjin Li <sup>1,2,\*</sup>

<sup>1</sup> Research Institute of Natural Gas Technology, PetroChina Southwest Oil & Gasfield Company, Chengdu 610213, China

<sup>2</sup> National Energy R&D Center of High Sulfur Gas Exploitation, Chengdu 610213, China

<sup>3</sup> PetroChina Southwest Oil & Gasfield Company, Chengdu 610213, China

\* Correspondence: li\_jj@petrochina.com.cn

## Table of contents

|                                                                                                                  |   |
|------------------------------------------------------------------------------------------------------------------|---|
| 1. Absorption evaluation experimental device and operating parameters .....                                      | 2 |
| 2. Experiment results of absorption of H <sub>2</sub> S and CO <sub>2</sub> by MDEA, TBEE and their mixture..... | 2 |
| 3. Comparison of absorption ability of fresh solution and regeneration solution .....                            | 3 |
| 4. Corrosion rate data of TBEE solvent system and MDEA aqueous solution .....                                    | 4 |
| 5. <sup>1</sup> H NMR spectrum of synthesized TBEE.....                                                          | 4 |

## 1. Absorption evaluation experimental device and operating parameters

**Table S1.** Comparison of absorption effect between atmospheric pressure test device and industrial device.

| Name of device                     |                  |                   | atmospheric pressure test device | industrial device |
|------------------------------------|------------------|-------------------|----------------------------------|-------------------|
| gas-liquid ratio                   | v/v              |                   | 93                               | 93                |
| Packing height or number of plates |                  |                   | 1.0 m                            | 10 plates         |
| Lean liquid inlet temperature      | °C               |                   | 39.6                             | 39.0              |
| Raw gas                            | H <sub>2</sub> S | %                 | 2.01                             | 1.96              |
|                                    | CO <sub>2</sub>  | %                 | 35.63                            | 35.38             |
| Purified gas                       | H <sub>2</sub> S | mg/m <sup>3</sup> | 46.72                            | 47.71             |
|                                    | CO <sub>2</sub>  | %                 | 29.16                            | 29.67             |

**Table S2.** Operating parameters for desulfurization performance evaluation.

| Items                              | Operating parameters | Items                                                                  | Operating parameters |
|------------------------------------|----------------------|------------------------------------------------------------------------|----------------------|
| H <sub>2</sub> S in raw gas, % (V) | 2.0~2.1              | Packing height, m                                                      | 1.0                  |
| CO <sub>2</sub> in raw gas, % (V)  | 30~31                | amine concentration, % (wt)                                            | 40                   |
| Lean liquid inlet temperature, °C  | 38~40                | The temperature of the rich liquid entering the regeneration tower, °C | 85~95                |
| Solution circulation volume, L/h   | 2.0                  | Regenerator operating pressure, MPa                                    | 0.04~0.08            |
| Gas flow, L/h                      | 400                  | Regeneration tower top temperature, °C                                 | 104~108              |

## 2. Experiment results of absorption of H<sub>2</sub>S and CO<sub>2</sub> by MDEA, TBEE and their mixture

**Table S3.** Experiment results of MDEA aqueous solution to absorb H<sub>2</sub>S and CO<sub>2</sub>.

| 40%MDEA+60%H <sub>2</sub> O |                |                         |               |                             |                  |                  |                 |                   |                 |                               |                                    |
|-----------------------------|----------------|-------------------------|---------------|-----------------------------|------------------|------------------|-----------------|-------------------|-----------------|-------------------------------|------------------------------------|
| Entry                       | Packing height | Lean liquid temperature | Feed gas flow | Solution circulation volume | gas-liquid ratio | Raw gas          |                 | Purified gas      |                 | H <sub>2</sub> S removal rate | CO <sub>2</sub> co-absorption rate |
|                             |                | °C                      |               |                             |                  | H <sub>2</sub> S | CO <sub>2</sub> | H <sub>2</sub> S  | CO <sub>2</sub> |                               |                                    |
|                             | m              |                         | L/h           | L/h                         |                  | %                | %               | mg/m <sup>3</sup> | %               | %                             | %                                  |
| 1                           | 1.0            | 39.2                    | 400           | 2.0                         | 200              | 2.01             | 30.45           | 366.86            | 25.66           | 98.37                         | 23.41                              |
| 2                           | 1.0            | 39.5                    | 400           | 2.0                         | 200              | 1.97             | 30.43           | 359.74            | 25.19           | 98.34                         | 25.17                              |
| 3                           | 1.0            | 39.6                    | 400           | 2.0                         | 200              | 2.00             | 30.50           | 374.23            | 25.60           | 98.33                         | 23.82                              |
| 4                           | 1.0            | 39.3                    | 400           | 2.0                         | 200              | 2.05             | 30.46           | 398.27            | 25.96           | 98.29                         | 22.28                              |
| 5                           | 1.0            | 39.7                    | 400           | 2.0                         | 200              | 2.04             | 30.50           | 378.24            | 25.85           | 98.36                         | 22.87                              |
|                             |                | average                 |               |                             |                  | 2.01             | 30.47           | 375.47            | 25.65           | 98.33                         | 23.52                              |

**Table S4.** Experiment results of TBEE aqueous solution to absorb H<sub>2</sub>S and CO<sub>2</sub>.

| 40%TBEE+60%H <sub>2</sub> O |                        |                       |      |                            |              |                  |                 |                   |                 |                                       |                                               |
|-----------------------------|------------------------|-----------------------|------|----------------------------|--------------|------------------|-----------------|-------------------|-----------------|---------------------------------------|-----------------------------------------------|
| Entry                       | Pack-<br>ing<br>height | Lean                  | Feed | Solu-                      | gas-         | Raw gas          |                 | Purified gas      |                 | H <sub>2</sub> S re-<br>moval<br>rate | CO <sub>2</sub><br>co-ab-<br>sorption<br>rate |
|                             |                        | liquid                | gas  | tion                       | liq-         | H <sub>2</sub> S | CO <sub>2</sub> | H <sub>2</sub> S  | CO <sub>2</sub> |                                       |                                               |
|                             |                        | tem-<br>pera-<br>ture | flow | circula-<br>tion<br>volume | uid<br>ratio |                  |                 |                   |                 |                                       |                                               |
|                             | m                      | °C                    | L/h  | L/h                        |              | %                | %               | mg/m <sup>3</sup> | %               | %                                     | %                                             |
| 1                           | 1.0                    | 38.5                  | 400  | 2.0                        | 200          | 2.08             | 30.29           | 27.04             | 25.17           | 99.88                                 | 24.90                                         |
| 2                           | 1.0                    | 38.5                  | 400  | 2.0                        | 200          | 2.01             | 29.21           | 32.49             | 25.23           | 99.86                                 | 20.54                                         |
| 3                           | 1.0                    | 38.5                  | 400  | 2.0                        | 200          | 2.03             | 29.55           | 37.06             | 26.00           | 99.84                                 | 18.65                                         |
| 4                           | 1.0                    | 38.5                  | 400  | 2.0                        | 200          | 2.11             | 30.17           | 25.72             | 26.70           | 99.90                                 | 18.24                                         |
| 5                           | 1.0                    | 38.5                  | 400  | 2.0                        | 200          | 2.10             | 30.41           | 28.71             | 26.67           | 99.88                                 | 19.28                                         |
|                             | average                |                       |      |                            |              | 2.07             | 29.93           | 30.20             | 25.95           | 99.87                                 | 20.38                                         |

**Table S5.** Experiment results of absorption of H<sub>2</sub>S and CO<sub>2</sub> by mixed solution of TBEE and MDEA.

| 5%TBEE+35%MDEA+60%H <sub>2</sub> O |                |                                   |                  |                                          |                              |                  |                 |                   |                 |                                       |                                               |
|------------------------------------|----------------|-----------------------------------|------------------|------------------------------------------|------------------------------|------------------|-----------------|-------------------|-----------------|---------------------------------------|-----------------------------------------------|
| Entry                              | Packing height | Lean liquid tem-<br>pera-<br>ture | Feed gas<br>flow | Solu-<br>tion cir-<br>culation<br>volume | gas-<br>liq-<br>uid<br>ratio | Raw gas          |                 | Purified gas      |                 | H <sub>2</sub> S re-<br>moval<br>rate | CO <sub>2</sub><br>co-ab-<br>sorption<br>rate |
|                                    |                |                                   |                  |                                          |                              | H <sub>2</sub> S | CO <sub>2</sub> | H <sub>2</sub> S  | CO <sub>2</sub> |                                       |                                               |
|                                    |                | m                                 | °C               | L/h                                      | L/h                          | %                | %               | mg/m <sup>3</sup> | %               |                                       |                                               |
| 1                                  | 1.0            | 38.8                              | 400              | 2.0                                      | 200                          | 1.96             | 30.98           | 47.18             | 26.35           | 99.79                                 | 22.55                                         |
| 2                                  | 1.0            | 38.5                              | 400              | 2.0                                      | 200                          | 2.02             | 30.5            | 44.19             | 25.71           | 99.80                                 | 23.43                                         |
| 3                                  | 1.0            | 38.8                              | 400              | 2.0                                      | 200                          | 1.92             | 30.42           | 47.53             | 25.86           | 99.78                                 | 22.42                                         |
| 4                                  | 1.0            | 38.8                              | 400              | 2.0                                      | 200                          | 2.02             | 30.6            | 46.79             | 26.01           | 99.80                                 | 22.59                                         |
| 5                                  | 1.0            | 38.5                              | 400              | 2.0                                      | 200                          | 2.02             | 30.59           | 45.3              | 26.05           | 99.80                                 | 22.39                                         |
|                                    |                | average                           |                  |                                          |                              | 1.99             | 30.62           | 46.20             | 26.00           | 99.79                                 | 22.68                                         |

### 3. Comparison of absorption ability of fresh solution and regeneration solution

**Table S6.** Comparison of absorption ability of fresh solution and regeneration solution.

| Solution           | Fresh solution<br>H <sub>2</sub> S (g·L <sup>-1</sup> ) | Solution after<br>regeneration<br>H <sub>2</sub> S (g·L <sup>-1</sup> ) | Fresh solution<br>CO <sub>2</sub> (g·L <sup>-1</sup> ) | Solution after<br>regeneration<br>CO <sub>2</sub> (g·L <sup>-1</sup> ) |
|--------------------|---------------------------------------------------------|-------------------------------------------------------------------------|--------------------------------------------------------|------------------------------------------------------------------------|
| 40%MDEA            | 5.868                                                   | 5.600                                                                   | 20.303                                                 | 19.920                                                                 |
| 40%TBEE            | 10.547                                                  | 10.223                                                                  | 20.270                                                 | 20.292                                                                 |
| 35%MDEA+5%TBE<br>E | 7.220                                                   | 6.988                                                                   | 21.795                                                 | 21.055                                                                 |

#### 4. Corrosion rate data of TBEE solvent system and MDEA aqueous solution

**Table S7.** Static corrosion rate data of TBEE solvent system and MDEA aqueous solution.

| Entry                 | H <sub>2</sub> S and CO <sub>2</sub> content in solution |                     | Test piece length                      | Test piece width | Thick-ness of test piece | Round hole diame-ter | weightweight before test after test |        | temp | time | Corro-sion rate |
|-----------------------|----------------------------------------------------------|---------------------|----------------------------------------|------------------|--------------------------|----------------------|-------------------------------------|--------|------|------|-----------------|
|                       | H <sub>2</sub> S g/L                                     | CO <sub>2</sub> g/L | mm                                     | mm               | mm                       | mm                   | g                                   | g      | °C   | h    | mm/a            |
| TBEE aqueous solution | 5.39                                                     | 25.69               | 40.00                                  | 13.22            | 2.16                     | 4.22                 | 8.4051                              | 8.4032 | 90   | 72   | 0.0229          |
|                       |                                                          |                     | 39.92                                  | 13.20            | 2.14                     | 4.22                 | 8.3601                              | 8.3582 | 90   | 72   | 0.0230          |
|                       |                                                          |                     | 40.00                                  | 13.22            | 2.16                     | 4.24                 | 8.3614                              | 8.3597 | 90   | 72   | 0.0205          |
|                       |                                                          |                     | Average corrosion rate in liquid phase |                  |                          |                      |                                     |        |      |      | 0.0221          |
| MDEA aqueous solution | 4.95                                                     | 26.27               | 39.94                                  | 13.14            | 2.12                     | 4.24                 | 8.3405                              | 8.3381 | 90   | 72   | 0.0293          |
|                       |                                                          |                     | 39.48                                  | 13.16            | 2.12                     | 4.24                 | 8.1947                              | 8.1924 | 90   | 72   | 0.0283          |
|                       |                                                          |                     | 40.02                                  | 13.20            | 2.16                     | 4.16                 | 8.3406                              | 8.3384 | 90   | 72   | 0.0266          |
|                       |                                                          |                     | Average corrosion rate in liquid phase |                  |                          |                      |                                     |        |      |      | 0.0281          |

#### 5. <sup>1</sup>H NMR spectrum of synthesized TBEE

**Figure S1.** <sup>1</sup>H NMR (400 MHz, D<sub>2</sub>O) δ 3.63–3.56 (m, 2H), 3.54–3.46 (m, 4H), 2.63 (s, 2H), 0.97 (s, 9H).

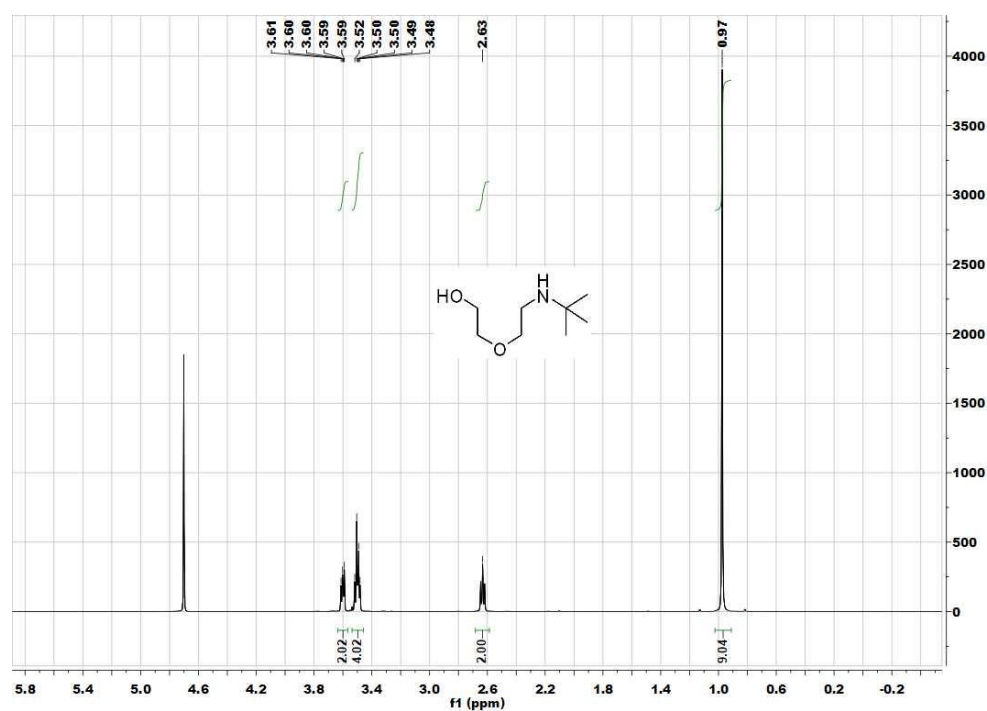

Supplement: s1 [file s1]
